# Supplementary material for: Accurate and Robust Genomic Prediction of Celiac Disease Using Statistical Learning
Source: PubMed Central journal article supplement (PMC3923679; doi:10.1371/journal.pgen.1004137), 2014-02-13
Supplement: pgen.1004137.s006.pdf [file pgen.1004137.s006.pdf]

Supplementary Table 1

| #  | RS         | Chr | BP        | Ref | Weight    | Stab. (%) | GeneSymbol       | Location   | Dist. (bp) |
|----|------------|-----|-----------|-----|-----------|-----------|------------------|------------|------------|
| 1  | rs2187668  | 6   | 32713862  | T   | 0.213782  | 100       | HLA-DQA1         | Genic      |            |
| 2  | rs9357152  | 6   | 32772938  | C   | -0.151141 | 100       | HLA-DQB1         | Intergenic | 30575      |
| 3  | rs3099844  | 6   | 31556955  | T   | 0.095107  | 100       | MICB             | Intergenic | 16994      |
| 4  | rs3129962  | 6   | 32487361  | A   | 0.091648  | 88        | BTNL2            | Intergenic | 4482       |
| 5  | rs3129763  | 6   | 32698903  | T   | 0.088432  | 100       | HLA-DQA1         | Intergenic | 14310      |
| 6  | rs1063355  | 6   | 32735692  | A   | -0.086255 | 100       | HLA-DQB1         | Genic      |            |
| 7  | rs2858308  | 6   | 32777978  | T   | 0.057213  | 100       | HLA-DQB1         | Intergenic | 35615      |
| 8  | rs7765379  | 6   | 32788906  | C   | -0.048124 | 100       | HLA-DQA2         | Intergenic | 28292      |
| 9  | rs1794282  | 6   | 32774504  | T   | 0.047955  | 100       | HLA-DQB1         | Intergenic | 32141      |
| 10 | rs9275224  | 6   | 32767856  | C   | -0.047468 | 100       | HLA-DQB1         | Intergenic | 25493      |
| 11 | rs2064478  | 6   | 33180244  | T   | 0.043888  | 98        | HLA-DPB2         | Intergenic | 8029       |
| 12 | rs204999   | 6   | 32217957  | C   | 0.037645  | 100       | PRRT1            | Intergenic | 6510       |
| 13 | rs17211510 | 6   | 32710408  | A   | -0.035793 | 100       | HLA-DQA1         | Intergenic | 2805       |
| 14 | rs9368699  | 6   | 31910520  | G   | -0.035638 | 89        | C6orf48, SNORD48 | Genic      |            |
| 15 | rs2856997  | 6   | 32889754  | T   | -0.026079 | 100       | HLA-DOB          | Genic      |            |
| 16 | rs17620389 | 6   | 38642407  | G   | 0.025118  | 70        | BTBD9            | Genic      |            |
| 17 | rs13098911 | 3   | 46210205  | T   | 0.024216  | 96        | CCR3             | Genic      |            |
| 18 | rs1559810  | 3   | 189607048 | T   | 0.023239  | 99        | LPP              | Genic      |            |
| 19 | rs9851967  | 3   | 189570322 | T   | -0.023087 | 100       | LPP              | Genic      |            |
| 20 | rs2327832  | 6   | 138014761 | C   | 0.022413  | 99        | OLIG3            | Intergenic | 157760     |
| 21 | rs429916   | 6   | 33086565  | A   | 0.020479  | 99        | HLA-DOA          | Genic      |            |
| 22 | rs2162610  | 2   | 204426974 | C   | 0.020260  | 97        | CTLA4            | Intergenic | 13936      |
| 23 | rs6090314  | 20  | 61327997  | T   | 0.019180  | 96        | BIRC7            | Intergenic | 9896       |
| 24 | rs10798176 | 1   | 170942148 | C   | -0.017969 | 97        | FASLG            | Intergenic | 40368      |
| 25 | rs302483   | 5   | 88179847  | G   | -0.017305 | 57        | MEF2C            | Genic      |            |
| 26 | rs13100170 | 3   | 97139125  | G   | 0.017101  | 90        | EPHA6            | Intergenic | 877032     |
| 27 | rs2635299  | 4   | 118762806 | C   | -0.017007 | 99        | NDST3            | Intergenic | 431707     |
| 28 | rs17095255 | 10  | 118543853 | A   | -0.016682 | 61        | HSPA12A          | Genic      |            |
| 29 | rs17021444 | 1   | 104695375 | C   | -0.015603 | 90        | AMY1A            | Intergenic | 592571     |
| 30 | rs9276502  | 6   | 32827644  | C   | 0.015514  | 74        | HLA-DQB2         | Intergenic | 4563       |
| 31 | rs10203407 | 2   | 66552300  | T   | -0.014764 | 33        | MEIS1            | Genic      |            |
| 32 | rs204990   | 6   | 32269408  | A   | 0.014194  | 96        | GPSM3            | Genic      |            |
| 33 | rs12086216 | 1   | 104601817 | T   | -0.014020 | 69        | AMY1A            | Intergenic | 499013     |
| 34 | rs2849015  | 6   | 32306914  | A   | 0.013608  | 98        | NOTCH4           | Intergenic | 7230       |
| 35 | rs16889229 | 4   | 13417061  | T   | 0.013509  | 69        | BOD1L1           | Intergenic | 178751     |
| 36 | rs36253    | 19  | 8230893   | G   | 0.013407  | 76        | CERS4            | Genic      |            |
| 37 | rs404890   | 6   | 32306845  | A   | 0.013205  | 38        | NOTCH4           | Intergenic | 7161       |
| 38 | rs9811792  | 3   | 161179692 | C   | 0.013039  | 91        | IL12A            | Intergenic | 9845       |
| 39 | rs12915188 | 15  | 98730436  | A   | -0.012683 | 88        | CERS3            | Intergenic | 30004      |
| 40 | rs1368910  | 2   | 80083549  | C   | -0.012608 | 65        | CTNNA2           | Genic      |            |

(continued)

| #  | RS         | Chr | BP        | Ref | Weight    | Stab. (%) | GeneSymbol | Location   | Dist. (bp) |
|----|------------|-----|-----------|-----|-----------|-----------|------------|------------|------------|
| 41 | rs224612   | 11  | 32019805  | A   | -0.012604 | 81        | RCN1       | Intergenic | 49513      |
| 42 | rs7762279  | 6   | 32863268  | C   | 0.012532  | 74        | HLA-DQB2   | Intergenic | 24042      |
| 43 | rs2031341  | 10  | 10626295  | A   | -0.012285 | 87        | CELF2      | Intergenic | 461061     |
| 44 | rs2473520  | 6   | 139472753 | T   | -0.011833 | 79        | HECA       | Intergenic | 25473      |
| 45 | rs877345   | 10  | 8093782   | C   | 0.011817  | 44        | TAF3       | Genic      |            |
| 46 | rs760883   | 6   | 16733599  | T   | -0.011505 | 73        | ATXN1      | Genic      |            |
| 47 | rs6865418  | 5   | 150567539 | A   | -0.011444 | 50        | CCDC69     | Genic      |            |
| 48 | rs1889548  | 1   | 94275785  | T   | -0.011227 | 79        | ABCA4      | Genic      |            |
| 49 | rs4835459  | 4   | 148966411 | G   | -0.011079 | 12        | ARHGAP10   | Genic      |            |
| 50 | rs9276472  | 6   | 32825202  | G   | 0.011054  | 66        | HLA-DQA2   | Intergenic | 3052       |
| 51 | rs1336981  | 6   | 152124062 | C   | 0.010885  | 67        | ESR1       | Genic      |            |
| 52 | rs11659563 | 18  | 71979269  | C   | 0.010824  | 70        | ZNF516     | Intergenic | 224171     |
| 53 | rs2503661  | 6   | 92817083  | A   | -0.010798 | 79        | EPHA7      | Intergenic | 1192781    |
| 54 | rs7734102  | 5   | 179086403 | T   | 0.010554  | 75        | CANX       | Genic      |            |
| 55 | rs765324   | 11  | 10691902  | A   | 0.010531  | 70        | MRV1       | Intergenic | 61556      |
| 56 | rs8118581  | 20  | 59323981  | A   | 0.010517  | 33        | CDH4       | Genic      |            |
| 57 | rs13081814 | 3   | 97031445  | G   | 0.010094  | 66        | EPHA6      | Intergenic | 984712     |
| 58 | rs12455576 | 18  | 52063003  | A   | -0.010086 | 19        | TXNL1      | Intergenic | 358252     |
| 59 | rs10736156 | 10  | 104009437 | G   | 0.009961  | 53        | GBF1       | Genic      |            |
| 60 | rs747860   | 14  | 64309647  | A   | 0.009861  | 60        | SPTB       | Genic      |            |
| 61 | rs2459444  | 10  | 37423602  | A   | 0.009812  | 79        | ANKRD30A   | Intergenic | 31287      |
| 62 | rs9378200  | 6   | 31680906  | C   | -0.009691 | 71        | AIF1       | Intergenic | 10179      |
| 63 | rs1353111  | 11  | 128780953 | C   | 0.009623  | 50        | BARX2      | Genic      |            |
| 64 | rs10520062 | 2   | 11067829  | T   | 0.009419  | 37        | KCNF1      | Intergenic | 96340      |
| 65 | rs11221332 | 11  | 127886184 | A   | 0.009196  | 71        | ETS1       | Genic      |            |
| 66 | rs4741986  | 9   | 4413007   | G   | 0.009190  | 51        | SLC1A1     | Intergenic | 67672      |
| 67 | rs17144110 | 7   | 21246477  | A   | -0.008975 | 33        | SP4        | Intergenic | 187917     |
| 68 | rs6933404  | 6   | 138000928 | C   | 0.008966  | 28        | OLIG3      | Intergenic | 143927     |
| 69 | rs2442749  | 6   | 31460019  | C   | 0.008908  | 69        | DDX39B     | Intergenic | 146170     |
| 70 | rs12653303 | 5   | 146863798 | C   | 0.008758  | 48        | DPYSL3     | Genic      |            |
| 71 | rs7067538  | 10  | 109596730 | C   | 0.008358  | 56        | SORCS1     | Intergenic | 682455     |
| 72 | rs7026544  | 9   | 129818335 | T   | 0.008127  | 19        | FAM102A    | Intergenic | 36097      |
| 73 | rs3903036  | 11  | 24622561  | T   | -0.008114 | 48        | LUZP2      | Genic      |            |
| 74 | rs1367273  | 2   | 7483477   | A   | -0.008067 | 33        | RNF144A    | Intergenic | 386134     |
| 75 | rs12584486 | 13  | 42282533  | C   | 0.007864  | 43        | FAM216B    | Intergenic | 21606      |
| 76 | rs12542756 | 8   | 3114526   | C   | 0.007676  | 55        | CSMD1      | Genic      |            |
| 77 | rs905426   | 15  | 29870041  | T   | 0.007668  | 55        | OTUD7A     | Genic      |            |
| 78 | rs2744718  | 1   | 22396314  | A   | 0.007535  | 35        | WNT4       | Intergenic | 54311      |
| 79 | rs570854   | 6   | 52320209  | G   | 0.007503  | 62        | PAQR8      | Intergenic | 55761      |
| 80 | rs17775775 | 10  | 115660803 | G   | -0.007434 | 21        | NHLRC2     | Intergenic | 2517       |

(continued)

| #   | RS         | Chr | BP        | Ref | Weight    | Stab. (%) | GeneSymbol | Location   | Dist. (bp) |
|-----|------------|-----|-----------|-----|-----------|-----------|------------|------------|------------|
| 81  | rs1596161  | 15  | 99086254  | C   | 0.007290  | 35        | ASB7       | Intergenic | 80063      |
| 82  | rs2377127  | 5   | 118288687 | G   | 0.007276  | 36        | DTWD2      | Genic      |            |
| 83  | rs354751   | 20  | 58338889  | G   | 0.007180  | 49        | C20orf197  | Intergenic | 259530     |
| 84  | rs2301226  | 6   | 33142574  | A   | -0.007174 | 56        | HLA-DPA1   | Genic      |            |
| 85  | rs4290865  | 4   | 92883724  | A   | -0.007153 | 54        | CCSER1     | Intergenic | 144492     |
| 86  | rs13435654 | 4   | 7490276   | A   | 0.007103  | 41        | SORCS2     | Genic      |            |
| 87  | rs1738074  | 6   | 159385965 | T   | 0.007066  | 60        | TAGAP      | Genic      |            |
| 88  | rs6889648  | 5   | 169564839 | A   | 0.007043  | 28        | C5orf58    | Intergenic | 28878      |
| 89  | rs618019   | 20  | 47840534  | T   | 0.007005  | 30        | SLC9A8     | Intergenic | 22332      |
| 90  | rs10026953 | 4   | 147683155 | T   | 0.006977  | 34        | SLC10A7    | Intergenic | 20835      |
| 91  | rs11203203 | 21  | 42709255  | T   | 0.006974  | 57        | UBASH3A    | Genic      |            |
| 92  | rs3852253  | 7   | 18832715  | G   | 0.006897  | 29        | HDAC9      | Genic      |            |
| 93  | rs3748816  | 1   | 2516606   | C   | -0.006724 | 61        | MMEL1      | Genic      |            |
| 94  | rs2219893  | 6   | 32877641  | C   | -0.006629 | 62        | HLA-DOB    | Intergenic | 11329      |
| 95  | rs138179   | 22  | 44523840  | A   | 0.006614  | 41        | ATXN10     | Genic      |            |
| 96  | rs4468578  | 15  | 32192404  | T   | -0.006541 | 39        | PGBD4      | Intergenic | 8621       |
| 97  | rs17072702 | 4   | 183213759 | G   | 0.006464  | 36        | TENM3      | Intergenic | 268408     |
| 98  | rs1035597  | 18  | 30741953  | T   | -0.006450 | 37        | DTNA       | Intergenic | 17550      |
| 99  | rs2346391  | 17  | 28343273  | G   | -0.006354 | 58        | SPACA3     | Genic      |            |
| 100 | rs2351643  | 8   | 63239550  | A   | -0.006308 | 44        | NKAIN3     | Intergenic | 84636      |
| 101 | rs693955   | 6   | 44299898  | A   | -0.006173 | 28        | SLC29A1    | Genic      |            |
| 102 | rs1464459  | 1   | 235911706 | T   | 0.006142  | 45        | RYR2       | Genic      |            |
| 103 | rs4851610  | 2   | 102501084 | G   | 0.006103  | 52        | SLC9A4     | Genic      |            |
| 104 | rs12639104 | 3   | 148900311 | T   | -0.006080 | 25        | ZIC1       | Intergenic | 286282     |
| 105 | rs11863993 | 16  | 5726576   | G   | -0.005952 | 48        | ALG1       | Intergenic | 651692     |
| 106 | rs4665072  | 2   | 160031937 | T   | -0.005922 | 50        | BAZ2B      | Genic      |            |
| 107 | rs1429248  | 2   | 155060456 | T   | -0.005912 | 25        | GALNT13    | Intergenic | 45146      |
| 108 | rs1133045  | 7   | 76762152  | C   | -0.005911 | 28        | CCDC146    | Genic      |            |
| 109 | rs673567   | 1   | 18150844  | G   | -0.005861 | 43        | ACTL8      | Intergenic | 125242     |
| 110 | rs1172990  | 9   | 92569628  | A   | -0.005845 | 36        | SYK        | Intergenic | 76373      |
| 111 | rs4652825  | 1   | 182059946 | G   | -0.005777 | 36        | RGL1       | Genic      |            |
| 112 | rs10009456 | 4   | 136314125 | A   | 0.005765  | 53        | PABPC4L    | Intergenic | 972500     |
| 113 | rs1550305  | 3   | 117027353 | T   | 0.005750  | 23        | LSAMP      | Genic      |            |
| 114 | rs6937046  | 6   | 165086231 | C   | 0.005682  | 36        | C6orf118   | Intergenic | 527304     |
| 115 | rs7684552  | 4   | 16691100  | T   | 0.005627  | 21        | LDB2       | Intergenic | 181893     |
| 116 | rs17761155 | 17  | 1380663   | G   | 0.005579  | 18        | PITPNA     | Genic      |            |
| 117 | rs7205534  | 16  | 80759119  | G   | -0.005548 | 44        | MPHOSPH6   | Genic      |            |
| 118 | rs748832   | 3   | 16826206  | G   | -0.005533 | 37        | PLCL2      | Genic      |            |
| 119 | rs10237550 | 7   | 112845911 | T   | -0.005492 | 44        | PPP1R3A    | Intergenic | 459102     |
| 120 | rs3744647  | 17  | 8165001   | T   | -0.005424 | 48        | ARHGEF15   | Genic      |            |

(continued)

| #   | RS         | Chr | BP        | Ref | Weight    | Stab. (%) | GeneSymbol | Location   | Dist. (bp) |
|-----|------------|-----|-----------|-----|-----------|-----------|------------|------------|------------|
| 121 | rs13314993 | 3   | 32990473  | G   | 0.005422  | 61        | CCR4       | Intergenic | 19471      |
| 122 | rs7937334  | 11  | 117696484 | T   | 0.005386  | 32        | CD3E       | Intergenic | 5016       |
| 123 | rs7137478  | 12  | 83773349  | T   | -0.005359 | 36        | SLC6A15    | Intergenic | 6192       |
| 124 | rs753507   | 13  | 23329745  | T   | 0.005314  | 31        | MIPEP      | Genic      |            |
| 125 | rs305522   | 3   | 11990313  | C   | 0.005305  | 27        | SYN2       | Intergenic | 30712      |
| 126 | rs12361949 | 11  | 7152914   | C   | -0.005288 | 38        | SYT9       | Intergenic | 77079      |
| 127 | rs1945921  | 11  | 130467592 | G   | -0.005256 | 39        | SNX19      | Intergenic | 176547     |
| 128 | rs735890   | 12  | 1624685   | G   | 0.005219  | 28        | WNT5B      | Genic      |            |
| 129 | rs6578296  | 11  | 2736546   | G   | -0.005209 | 20        | KCNQ1      | Genic      |            |
| 130 | rs4900384  | 14  | 97568704  | G   | 0.005191  | 28        | BCL11B     | Intergenic | 1141536    |
| 131 | rs4369223  | 1   | 15400921  | T   | 0.005184  | 38        | TMEM51     | Genic      |            |
| 132 | rs2837768  | 21  | 40951877  | C   | 0.005149  | 33        | DSCAM      | Genic      |            |
| 133 | rs6890606  | 5   | 167830877 | C   | 0.005101  | 37        | WWC1       | Intergenic | 2276       |
| 134 | rs10951781 | 7   | 44984788  | T   | -0.005097 | 29        | MYO1G      | Genic      |            |
| 135 | rs12685669 | 9   | 20112244  | T   | 0.005088  | 26        | MLLT3      | Intergenic | 224196     |
| 136 | rs4663581  | 2   | 235992660 | A   | -0.005079 | 33        | AGAP1      | Intergenic | 75409      |
| 137 | rs17561086 | 11  | 105903230 | T   | -0.005077 | 26        | GUCY1A2    | Intergenic | 160254     |
| 138 | rs2658862  | 11  | 131076004 | T   | -0.005065 | 24        | NTM        | Genic      |            |
| 139 | rs9634310  | 12  | 45832324  | T   | 0.005054  | 50        | PCED1B     | Genic      |            |
| 140 | rs6780338  | 3   | 71112098  | G   | -0.005048 | 19        | FOXP1      | Genic      |            |
| 141 | rs10967946 | 9   | 27451643  | T   | -0.005006 | 21        | MOB3B      | Genic      |            |
| 142 | rs355816   | 2   | 165417128 | T   | -0.004986 | 17        | COBLL1     | Intergenic | 10351      |
| 143 | rs12196758 | 6   | 90052018  | G   | -0.004933 | 20        | GABRR2     | Genic      |            |
| 144 | rs10854214 | 20  | 59137313  | T   | 0.004924  | 36        | CDH4       | Intergenic | 123651     |
| 145 | rs1014486  | 3   | 161173806 | G   | -0.004914 | 43        | IL12A      | Intergenic | 15731      |
| 146 | rs11763166 | 7   | 131503450 | C   | 0.004912  | 30        | PLXNA4     | Genic      |            |
| 147 | rs17685465 | 5   | 132767225 | C   | 0.004912  | 29        | FSTL4      | Genic      |            |
| 148 | rs9384261  | 6   | 150593881 | A   | 0.004882  | 15        | PPP1R14C   | Genic      |            |
| 149 | rs372741   | 18  | 75370277  | G   | -0.004860 | 40        | NFATC1     | Genic      |            |
| 150 | rs3810909  | 9   | 114971513 | C   | 0.004833  | 20        | FKBP15     | Genic      |            |
| 151 | rs6679417  | 1   | 241147146 | A   | 0.004826  | 13        | CEP170     | Intergenic | 208902     |
| 152 | rs690336   | 18  | 8844219   | A   | -0.004820 | 24        | SOGA2      | Intergenic | 22380      |
| 153 | rs1479552  | 3   | 2539452   | C   | 0.004813  | 37        | CNTN4      | Genic      |            |
| 154 | rs2166488  | 2   | 157868082 | T   | -0.004698 | 21        | GALNT5     | Genic      |            |
| 155 | rs2611249  | 4   | 166825748 | C   | -0.004653 | 32        | CPE        | Intergenic | 187535     |
| 156 | rs218218   | 2   | 33181898  | C   | 0.004639  | 24        | LTBP1      | Genic      |            |
| 157 | rs913908   | 13  | 29623876  | A   | -0.004617 | 26        | KATNAL1    | Intergenic | 56800      |
| 158 | rs9399642  | 6   | 148647729 | G   | 0.004551  | 25        | SASH1      | Intergenic | 58167      |
| 159 | rs336506   | 2   | 105691151 | C   | 0.004525  | 21        | NCK2       | Intergenic | 146800     |
| 160 | rs1864516  | 8   | 4352789   | G   | 0.004520  | 27        | CSMD1      | Genic      |            |

(continued)

| #   | RS         | Chr | BP        | Ref | Weight    | Stab. (%) | GeneSymbol | Location   | Dist. (bp) |
|-----|------------|-----|-----------|-----|-----------|-----------|------------|------------|------------|
| 161 | rs347142   | 3   | 32452828  | G   | 0.004519  | 21        | CMTM7      | Genic      |            |
| 162 | rs6845272  | 4   | 136759345 | T   | -0.004436 | 38        | PABPC4L    | Intergenic | 1417720    |
| 163 | rs7761698  | 6   | 149483938 | G   | 0.004428  | 45        | UST        | Intergenic | 46992      |
| 164 | rs4450019  | 1   | 113065234 | T   | -0.004418 | 32        | FAM19A3    | Genic      |            |
| 165 | rs4858692  | 3   | 25050171  | C   | -0.004392 | 38        | RARB       | Intergenic | 395055     |
| 166 | rs2364482  | 12  | 6372392   | G   | -0.004390 | 16        | LTBR       | Intergenic | 2027       |
| 167 | rs494387   | 19  | 39256568  | C   | -0.004350 | 19        | LSM14A     | Intergenic | 98819      |
| 168 | rs6956744  | 7   | 82209312  | A   | 0.004331  | 21        | PCLO       | Intergenic | 16514      |
| 169 | rs2901840  | 2   | 120844238 | T   | -0.004252 | 15        | INHBB      | Intergenic | 20317      |
| 170 | rs856135   | 1   | 157216129 | G   | 0.004237  | 21        | PYHIN1     | Intergenic | 2987       |
| 171 | rs920572   | 3   | 144472022 | A   | 0.004212  | 26        | SLC9A9     | Genic      |            |
| 172 | rs1553985  | 4   | 76773628  | C   | 0.004111  | 33        | CDKL2      | Genic      |            |
| 173 | rs2837766  | 21  | 40950152  | T   | -0.004093 | 34        | DSCAM      | Genic      |            |
| 174 | rs4679208  | 3   | 127363812 | C   | 0.004063  | 29        | ALDH1L1    | Genic      |            |
| 175 | rs9290242  | 3   | 165898590 | A   | -0.004053 | 20        | SI         | Intergenic | 281253     |
| 176 | rs8035542  | 15  | 91595305  | T   | -0.004039 | 21        | RGMA       | Intergenic | 162139     |
| 177 | rs1254930  | 14  | 61579400  | C   | -0.004032 | 38        | SYT16      | Genic      |            |
| 178 | rs9915813  | 17  | 45368114  | A   | -0.004006 | 16        | DLX4       | Intergenic | 33717      |
| 179 | rs2253612  | 2   | 201276678 | C   | 0.003984  | 14        | AOX1       | Intergenic | 33030      |
| 180 | rs2253698  | 20  | 1493617   | C   | -0.003964 | 26        | SIRPB1     | Genic      |            |
| 181 | rs11221388 | 11  | 127980211 | A   | -0.003948 | 29        | ETS1       | Intergenic | 31975      |
| 182 | rs11110390 | 12  | 99399032  | A   | -0.003925 | 40        | NR1H4      | Genic      |            |
| 183 | rs9615482  | 22  | 46032213  | C   | -0.003924 | 22        | TBC1D22A   | Intergenic | 84279      |
| 184 | rs12509421 | 4   | 7980412   | C   | 0.003907  | 25        | AFAP1      | Genic      |            |
| 185 | rs1581688  | 7   | 112510329 | G   | 0.003903  | 17        | GPR85      | Genic      |            |
| 186 | rs11715416 | 3   | 194797310 | G   | 0.003838  | 32        | OPA1       | Genic      |            |
| 187 | rs4890643  | 18  | 42167123  | A   | 0.003806  | 29        | RNF165     | Genic      |            |
| 188 | rs11062040 | 12  | 1961518   | A   | 0.003798  | 28        | DCP1B      | Genic      |            |
| 189 | rs1174746  | 7   | 53109485  | A   | 0.003772  | 29        | POM121L12  | Intergenic | 37735      |
| 190 | rs705352   | 7   | 90536300  | T   | -0.003751 | 16        | CDK14      | Genic      |            |
| 191 | rs4912274  | 1   | 57903614  | T   | -0.003731 | 22        | DAB1       | Genic      |            |
| 192 | rs2290600  | 3   | 109586117 | C   | 0.003689  | 43        | MYH15      | Genic      |            |
| 193 | rs7071424  | 10  | 131364237 | C   | -0.003684 | 16        | MGMT       | Genic      |            |
| 194 | rs1542287  | 16  | 8366510   | C   | -0.003671 | 34        | METTL22    | Intergenic | 260513     |
| 195 | rs7079743  | 10  | 115182472 | T   | 0.003630  | 29        | HABP2      | Intergenic | 120398     |
| 196 | rs1540528  | 2   | 241767359 | T   | 0.003617  | 17        | PPP1R7     | Genic      |            |
| 197 | rs9871790  | 3   | 39388528  | T   | 0.003615  | 23        | SLC25A38   | Intergenic | 11691      |
| 198 | rs11646037 | 16  | 6176433   | C   | 0.003608  | 19        | RBFOX1     | Genic      |            |
| 199 | rs4689915  | 4   | 4717231   | C   | 0.003562  | 16        | STX18      | Intergenic | 122638     |
| 200 | rs10864210 | 1   | 214083474 | G   | 0.003473  | 20        | USH2A      | Genic      |            |

(continued)

| #   | RS         | Chr | BP        | Ref | Weight    | Stab. (%) | GeneSymbol | Location   | Dist. (bp) |
|-----|------------|-----|-----------|-----|-----------|-----------|------------|------------|------------|
| 201 | rs10478    | 13  | 29675202  | C   | 0.003471  | 19        | KATNAL1    | Genic      |            |
| 202 | rs2376997  | 20  | 29782860  | A   | -0.003448 | 20        | BCL2L1     | Intergenic | 9177       |
| 203 | rs4240702  | 9   | 136735680 | T   | -0.003422 | 33        | COL5A1     | Genic      |            |
| 204 | rs526282   | 12  | 248165    | G   | 0.003396  | 24        | SLC6A13    | Intergenic | 8685       |
| 205 | rs2835930  | 21  | 38043371  | A   | 0.003353  | 29        | KCNJ6      | Genic      |            |
| 206 | rs26435    | 5   | 165240985 | A   | 0.003314  | 21        | TENM2      | Intergenic | 1403435    |
| 207 | rs1378942  | 15  | 72864420  | G   | 0.003296  | 23        | CSK        | Genic      |            |
| 208 | rs3744700  | 17  | 4584759   | T   | -0.003241 | 23        | CXCL16     | Genic      |            |
| 209 | rs2882513  | 2   | 156334094 | C   | 0.003216  | 24        | NR4A2      | Intergenic | 556407     |
| 210 | rs3117230  | 6   | 33183613  | C   | 0.003146  | 93        | HLA-DPB2   | Intergenic | 4660       |
| 211 | rs4237270  | 9   | 70696279  | C   | -0.003144 | 17        | PIP5K1B    | Genic      |            |
| 212 | rs1565585  | 12  | 27037709  | T   | -0.003121 | 17        | TM7SF3     | Genic      |            |
| 213 | rs4233131  | 1   | 185960354 | C   | -0.003106 | 20        | PLA2G4A    | Intergenic | 736090     |
| 214 | rs4756856  | 11  | 16598294  | G   | 0.003096  | 27        | SOX6       | Genic      |            |
| 215 | rs4937390  | 11  | 128285012 | C   | -0.003094 | 22        | KCNJ5      | Genic      |            |
| 216 | rs4238606  | 16  | 11435090  | T   | -0.003091 | 23        | RMI2       | Intergenic | 82941      |
| 217 | rs784678   | 9   | 108951910 | C   | 0.003080  | 19        | RAD23B     | Intergenic | 133821     |
| 218 | rs7633774  | 3   | 23708196  | A   | 0.003067  | 24        | UBE2E2     | Intergenic | 101869     |
| 219 | rs6664618  | 1   | 66487172  | T   | -0.003003 | 23        | PDE4B      | Genic      |            |
| 220 | rs8012823  | 14  | 72343297  | A   | -0.002981 | 11        | DPF3       | Genic      |            |
| 221 | rs4296166  | 14  | 32022118  | A   | -0.002937 | 24        | AKAP6      | Genic      |            |
| 222 | rs10120215 | 9   | 91490874  | G   | -0.002911 | 21        | UNQ6494    | Genic      |            |
| 223 | rs7863610  | 9   | 77416239  | T   | -0.002910 | 12        | PCSK5      | Intergenic | 279678     |
| 224 | rs1468791  | 2   | 102458453 | A   | 0.002841  | 44        | SLC9A4     | Genic      |            |
| 225 | rs6054024  | 20  | 6177282   | A   | -0.002555 | 14        | FERMT1     | Intergenic | 129080     |
| 226 | rs2981479  | 3   | 126285921 | C   | 0.002553  | 31        | SLC12A8    | Genic      |            |
| 227 | rs999915   | 1   | 85111666  | A   | -0.002398 | 18        | LPAR3      | Genic      |            |
| 228 | rs2835931  | 21  | 38043518  | T   | 0.000359  | 5         | KCNJ6      | Genic      |            |
