# Supplementary material for: Accurate and Robust Genomic Prediction of Celiac Disease Using Statistical Learning
Source: PubMed Central journal article supplement (PMC3923679; doi:10.1371/journal.pgen.1004137), 2014-02-13
Supplement: pgen.1004137.s007.pdf [file pgen.1004137.s007.pdf]

| Prevalence (%) | Threshold (% of population) | Sensitivity (%) | Specificity (%) | Correct positive diagnoses per 1000 positive diagnoses (1000×PPV) | Correct negative diagnoses per 1000 negative diagnoses (1000×NPV) | Incorrect diagnoses per 1000 correct disease diagnoses |
|----------------|-----------------------------|-----------------|-----------------|-------------------------------------------------------------------|-------------------------------------------------------------------|--------------------------------------------------------|
| 1              | 1                           | 9               | 100             | 193                                                               | 991                                                               | 4999                                                   |
|                | 2                           | 16              | 99              | 161                                                               | 992                                                               | 6785                                                   |
|                | 3                           | 23              | 99              | 149                                                               | 992                                                               | 6955                                                   |
|                | 5                           | 30              | 97              | 99                                                                | 993                                                               | 10008                                                  |
|                | 10                          | 49              | 93              | 67                                                                | 995                                                               | 14657                                                  |
|                | 15                          | 62              | 89              | 54                                                                | 996                                                               | 17948                                                  |
|                | 20                          | 74              | 85              | 45                                                                | 997                                                               | 21429                                                  |
|                | 30                          | 85              | 75              | 33                                                                | 998                                                               | 30479                                                  |
|                | 40                          | 92              | 65              | 25                                                                | 999                                                               | 39778                                                  |
|                | 50                          | 95              | 54              | 20                                                                | 999                                                               | 50481                                                  |
|                | 60                          | 96              | 43              | 16                                                                | 999                                                               | 61449                                                  |
|                | 70                          | 97              | 33              | 14                                                                | 999                                                               | 72394                                                  |
|                | 90                          | 99              | 11              | 11                                                                | 999                                                               | 94035                                                  |
|                | 95                          | 100             | 5               | 10                                                                | 1000                                                              | 99350                                                  |
| 3              | 1                           | 8               | 100             | 426                                                               | 973                                                               | 1576                                                   |
|                | 2                           | 15              | 99              | 374                                                               | 974                                                               | 1755                                                   |
|                | 3                           | 21              | 99              | 342                                                               | 976                                                               | 2003                                                   |
|                | 5                           | 30              | 97              | 256                                                               | 978                                                               | 2994                                                   |
|                | 10                          | 46              | 93              | 173                                                               | 983                                                               | 4844                                                   |
|                | 15                          | 60              | 89              | 148                                                               | 987                                                               | 5845                                                   |
|                | 20                          | 72              | 85              | 127                                                               | 990                                                               | 6974                                                   |
|                | 30                          | 85              | 75              | 96                                                                | 994                                                               | 9565                                                   |
|                | 40                          | 92              | 65              | 74                                                                | 996                                                               | 12669                                                  |
|                | 50                          | 95              | 54              | 59                                                                | 997                                                               | 15982                                                  |
|                | 60                          | 97              | 43              | 50                                                                | 998                                                               | 19376                                                  |
|                | 70                          | 98              | 33              | 42                                                                | 998                                                               | 22770                                                  |
|                | 90                          | 99              | 11              | 33                                                                | 998                                                               | 29753                                                  |
|                | 95                          | 100             | 5               | 31                                                                | 997                                                               | 31482                                                  |
| 10             | 1                           | 8               | 100             | 739                                                               | 906                                                               | 357                                                    |
|                | 2                           | 15              | 99              | 689                                                               | 912                                                               | 454                                                    |
|                | 3                           | 21              | 99              | 661                                                               | 918                                                               | 514                                                    |
|                | 5                           | 29              | 97              | 554                                                               | 925                                                               | 808                                                    |
|                | 10                          | 46              | 93              | 436                                                               | 939                                                               | 1298                                                   |
|                | 15                          | 60              | 89              | 387                                                               | 952                                                               | 1586                                                   |
|                | 20                          | 71              | 85              | 344                                                               | 963                                                               | 1909                                                   |
|                | 30                          | 84              | 75              | 277                                                               | 977                                                               | 2618                                                   |
|                | 40                          | 91              | 65              | 225                                                               | 985                                                               | 3452                                                   |
|                | 50                          | 94              | 54              | 187                                                               | 988                                                               | 4351                                                   |
|                | 60                          | 97              | 43              | 161                                                               | 991                                                               | 5233                                                   |
|                | 70                          | 98              | 33              | 140                                                               | 994                                                               | 6141                                                   |
|                | 90                          | 99              | 11              | 111                                                               | 993                                                               | 8030                                                   |
|                | 95                          | 100             | 5               | 105                                                               | 993                                                               | 8496                                                   |
| 20             | 1                           | 8               | 100             | 860                                                               | 812                                                               | 163                                                    |
|                | 2                           | 14              | 99              | 825                                                               | 823                                                               | 212                                                    |
|                | 3                           | 20              | 99              | 808                                                               | 833                                                               | 238                                                    |
|                | 5                           | 28              | 97              | 730                                                               | 845                                                               | 370                                                    |
|                | 10                          | 45              | 93              | 628                                                               | 872                                                               | 592                                                    |
|                | 15                          | 59              | 89              | 581                                                               | 897                                                               | 721                                                    |
|                | 20                          | 71              | 85              | 538                                                               | 920                                                               | 859                                                    |
|                | 30                          | 84              | 75              | 460                                                               | 949                                                               | 1176                                                   |
|                | 40                          | 91              | 65              | 392                                                               | 966                                                               | 1552                                                   |
|                | 50                          | 94              | 54              | 338                                                               | 972                                                               | 1959                                                   |
|                | 60                          | 96              | 43              | 298                                                               | 979                                                               | 2355                                                   |
|                | 70                          | 98              | 33              | 266                                                               | 984                                                               | 2763                                                   |
|                | 90                          | 99              | 11              | 217                                                               | 985                                                               | 3604                                                   |
|                | 95                          | 100             | 5               | 208                                                               | 984                                                               | 3813                                                   |

Supplementary Table 2
